# Supplementary material for: Nitrate pollution and its transfer in surface water and groundwater in irrigated areas: a case study of the Piedmont of South Taihang Mountains, China
Source: Royal Society of Chemistry journal article supplement (doi:10.1039/c4em00200h), 2014-01-01
Supplement: c4em00200h1.pdf [file c4em00200h1.pdf]

## Supporting Information

**Table A. Sample sites information of surface water**

| ID   | Location                             | Date | Water types                                      |
|------|--------------------------------------|------|--------------------------------------------------|
| w212 | Grand canyon in Linzhou District     | 7-18 | River water                                      |
| w213 | Upstream of the Grand canyon         | 7-19 | Spring water                                     |
| w1   | Longdong Town in Jiaozuo District    | 8-3  | River water                                      |
| w6   | Yellow River in Wen County           | 8-7  | Yellow River water                               |
| w167 | Houzhaidan river in Qinyang County   | 8-10 | River water<br>receiving power<br>plant effluent |
| w11  | Dasha river, south of Qintun Town    | 8-14 | River water                                      |
| w13  | Jiangou river                        | 8-14 | River water                                      |
| w14  | Qin river in Wushe County            | 8-14 | River water                                      |
| w29  | Dasha river in Xiuwu County          | 8-20 | River water                                      |
| w33  | Xingwu Bridge over Yellow River      | 8-21 | Yellow River water                               |
| w36  | Qin river in Wushe County            | 8-21 | River water                                      |
| w37  | Communist canal in Wushe County      | 8-21 | River water                                      |
| w39  | Yellow river in Wushe County         | 8-21 | Yellow River water                               |
| w40  | Qin river in Wushe County            | 8-21 | River water                                      |
| w43  | Dan river in Bo'ai County            | 8-22 | River water                                      |
| w52  | Qin river in Bo'ai County            | 8-22 | River water                                      |
| w61  | Qinhe in Qinyang District            | 8-23 | River water                                      |
| w165 | Qingtianhe reservoir in Bo'ai County | 8-25 | River water                                      |
| w169 | Downstream of Qingtianhe reservoir   | 8-25 | Reservoir water                                  |
| w91  | Tagang Town in Weihui County         | 9-9  | River water                                      |
| w92  | Taganghu reservoir in Weihui County  | 9-9  | Reservoir water                                  |
| w93  | Cang river in Weihui County          | 9-9  | River water                                      |
| w125 | Wenming canal in Changheng County    | 9-9  | River water                                      |
| w130 | Ergan canal in Changheng County      | 9-9  | River water                                      |
| w132 | Yellow river in Changheng County     | 9-9  | Yellow River water                               |
| w100 | Huamu river in Hui County            | 9-10 | River water                                      |
| w102 | Zancheng river in Hui County         | 9-10 | River water                                      |
| w111 | Zhulou river in Xinxiang District    | 9-10 | Irrigation ditch                                 |
| w113 | Yellow river in Zhengzhou District   | 9-10 | Yellow River water                               |
| w140 | Yellow river in Kaifeng District     | 9-10 | Yellow River water                               |
| w148 | Liuqing river in Yanjin County       | 9-10 | River water                                      |
| w155 | Baoquan reservoir in Hui County      | 9-11 | Reservoir water                                  |
| w153 | Upstream of Baoquan reservoir        | 9-12 | River water                                      |
| w154 | Downstream of Baoquan reservoir      | 9-12 | River water                                      |
| w73  | Shimen reservoir in Hui County       | 9-14 | Reservoir water                                  |

**Table B. Sample sites information of rainfall**

| ID   | Location                     | Date | Rainfall amount |
|------|------------------------------|------|-----------------|
| w204 | Ji Town in Hebi District     | 7-22 | 107mm           |
| w202 | Yuhekou hydrological station | 7-28 | 38mm            |
| w158 | Qinyang Town                 | 7-29 | 187mm           |
| w159 | Jiaozuo City                 | 7-29 | 187mm           |
| w160 | Henan Polytechnic University | 7-29 | 187mm           |
| w211 | Xinxiang City                | 7-29 | 187mm           |
| w201 | Yuhekou hydrological station | 8-5  | 50mm            |
| w161 | Bo'ai Town                   | 8-10 | 80mm            |
| w162 | Xiuwu Town                   | 8-10 | 80mm            |
| w163 | Henan Polytechnic University | 8-10 | 80mm            |
| w164 | Henan Polytechnic University | 8-10 | 80mm            |
| w168 | Qinyang Town                 | 8-10 | 80mm            |
| w210 | Xinxiang City                | 8-30 | 177mm           |

Data source: China Meteorological Data Sharing Service System ([http://cdc.cma.gov.cn/cdc\\_en/home.dd](http://cdc.cma.gov.cn/cdc_en/home.dd))
